# Supplementary material for: Laser-induced synthesis of Ag nanoparticles on the silanized surface of a fiber taper and applications as a SERS probe
Source: Royal Society of Chemistry journal article supplement (doi:10.1039/c5ra18504a), 2015-01-01
Supplement: c5ra18504a1.pdf [file c5ra18504a1.pdf]

## **Electronic Supplementary Information**

### **Laser-induced synthesis of Ag nanoparticles on the silanized surface of the fiber taper and application as SERS probe**

Jie Cao,\* Di Zhao, and Qinghe Mao

Anhui Provincial Key Lab of Photonics Devices and Materials, Anhui  
Institute of Optics and Fine Mechanics, Chinese Academy of Sciences,  
Hefei 230031, China.

E-mail: candj@mail.ustc.edu.cn

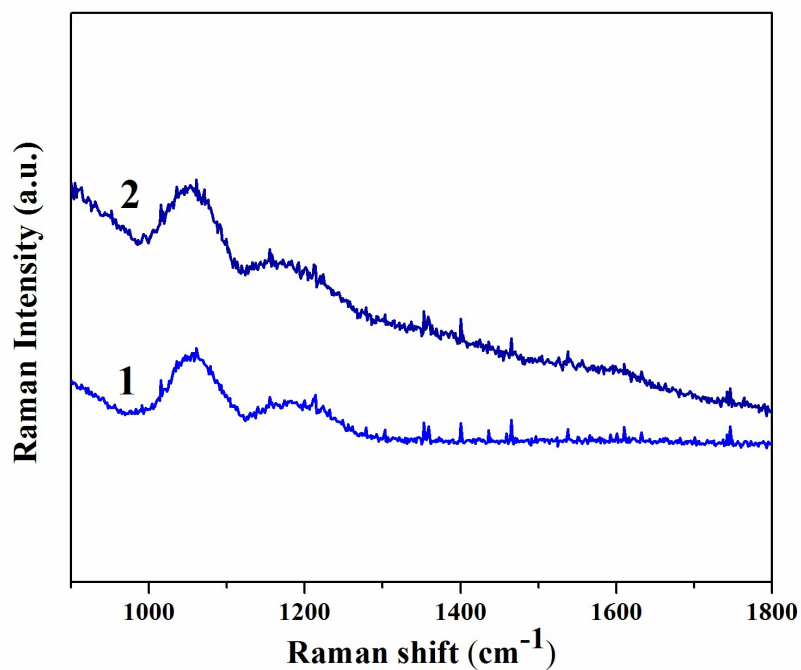

**Fig. S1** The background Raman spectrum introduced by the naked fiber taper (curve 1), and the Raman spectrum of the silanized fiber probe with the citrate ions and APTMS molecules hung on (curve 2). All the spectra were measured in water at 20 mW.

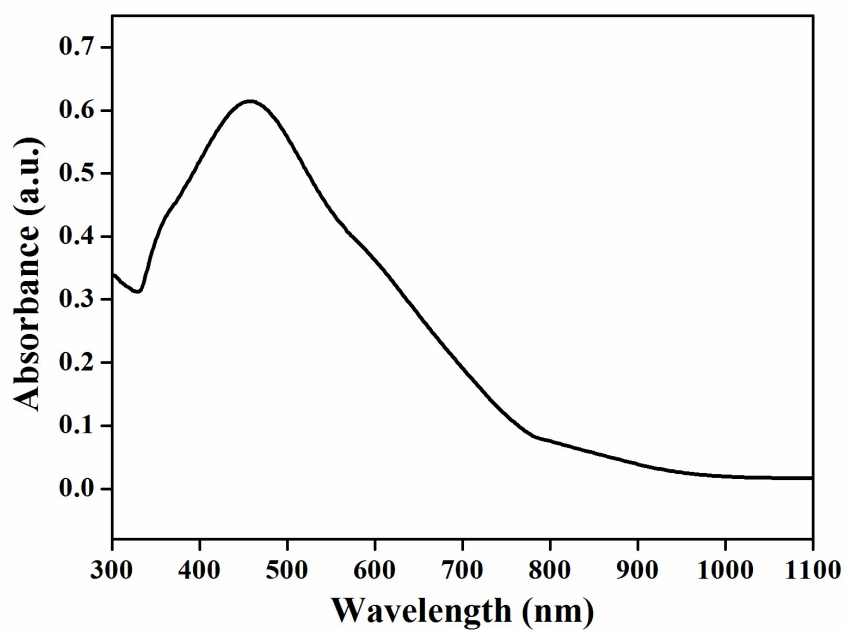

**Fig. S2** UV-Vis-NIR absorbance spectrum of the AgNPs on the silanized fiber probe.

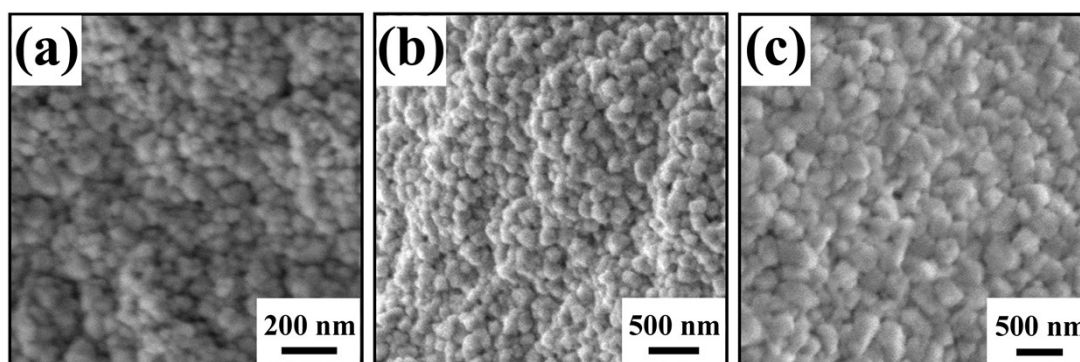

**Fig. S3** (a-c) SEM images of the AgNPs on the silanized fiber probes prepared with different laser-induced times (10, 30, and 60 min, respectively).
